# Supplementary material for: Systemic Immunomodulatory Treatments for Patients With Atopic Dermatitis: A Systematic Review and Network Meta-analysis
Source: PubMed Central journal article supplement (PMC7177646; doi:10.1001/jamadermatol.2020.0796), 2020-04-22
Supplement: jamadermatol-156-659-s001.pdf [file jamadermatol-156-659-s001.pdf]

## Supplementary Online Content

Drucker AM, Ellis AG, Bohdanowicz M, et al. Systemic immunomodulatory treatments for patients with atopic dermatitis: a systematic review and network meta-analysis. *JAMA Dermatol*. Published online April 22, 2020. doi:10.1001/jamadermatol.2020.0796

**eTable 1.** Risk of Bias in Trials

**eTable 2.** League Table of Arms Included in the Network Meta-analysis of Change in QoL on the Standardized Mean Difference Scale up to 16 Weeks of Treatment Among Medications Currently in Use

**eTable 3.** League Table of Arms Included in the Network Meta-analysis of Change in Itch on the Standardized Mean Difference Scale up to 16 Weeks of Treatment Among Medications Currently in Use

**eFigure 1.** Network Plot of Arms Included in the Network Meta-analysis of Change in POEM Score up to 16 Weeks of Treatment – Main Analysis

**eFigure 2.** Network Plot of Arms Included in the Network Meta-analysis of Change in DLQI Score up to 16 Weeks of Treatment – Main Analysis

**eFigure 3.** Network Plot of Arms Included in the Network Meta-analysis of Change in QoL on the Standardized Mean Difference Scale up to 16 Weeks of Treatment – Among Medications Currently in Use

**eFigure 4.** Network Plot of Arms Included in the Network Meta-analysis of Change in Itch on the Standardized Mean Difference Scale up to 16 Weeks of Treatment – Among Medications Currently in Use

**eReferences.**

This supplementary material has been provided by the authors to give readers additional information about their work.

**eTable 1. Risk of Bias in Trials**

| Reference                             | Random sequence generation | Allocation concealment | Blinding of participants and personnel | Blinding of outcome assessment | Incomplete outcome data | Selective reporting | Other bias |
|---------------------------------------|----------------------------|------------------------|----------------------------------------|--------------------------------|-------------------------|---------------------|------------|
| Sowden UK 1991 <sup>1</sup>           | Unclear                    | Unclear                | Low                                    | Low                            | High                    | Unclear             | Low        |
| Hanifin USA 1993 <sup>2</sup>         | Low                        | Unclear                | Low                                    | Unclear                        | High                    | Unclear             | Low        |
| Munro UK 1994 <sup>3</sup>            | Unclear                    | Unclear                | Low                                    | Unclear                        | High                    | Unclear             | Unclear    |
| Czech Germany 2000 <sup>4</sup>       | Low                        | Unclear                | Unclear                                | Unclear                        | Low                     | Unclear             | Unclear    |
| Jang Korea 2000 <sup>5</sup>          | Unclear                    | Unclear                | Unclear                                | Unclear                        | Unclear                 | Unclear             | Unclear    |
| Granlund Finland 2001 <sup>6</sup>    | Unclear                    | Unclear                | High                                   | High                           | Unclear                 | Unclear             | Low        |
| Berth-Jones UK 2002 <sup>7</sup>      | Low                        | Unclear                | Low                                    | Unclear                        | High                    | Unclear             | High       |
| Pacor Italy 2004 <sup>8</sup>         | Unclear                    | Unclear                | Low                                    | Low                            | Low                     | Unclear             | Unclear    |
| Bermanian Iran 2005 <sup>9</sup>      | Unclear                    | Unclear                | High                                   | High                           | High                    | Unclear             | Unclear    |
| Meggitt UK 2006 <sup>10</sup>         | Low                        | Unclear                | Low                                    | Unclear                        | Unclear                 | Unclear             | Low        |
| Jee Korea 2011 <sup>11</sup>          | Unclear                    | Unclear                | Unclear                                | Unclear                        | High                    | Unclear             | High       |
| Schram Holland 2011 <sup>12</sup>     | Low                        | Low                    | High                                   | Unclear                        | Low                     | Low                 | Low        |
| El-Khalawany Egypt 2013 <sup>13</sup> | Low                        | Unclear                | High                                   | High                           | Low                     | Low                 | Low        |
| Iyengar USA 2013 <sup>14</sup>        | Unclear                    | Unclear                | Unclear                                | Unclear                        | Low                     | High                | Low        |

| Reference                                         | Random sequence generation | Allocation concealment | Blinding of participants and personnel | Blinding of outcome assessment | Incomplete outcome data | Selective reporting | Other bias |
|---------------------------------------------------|----------------------------|------------------------|----------------------------------------|--------------------------------|-------------------------|---------------------|------------|
| Beck USA 2014 <sup>15,16</sup>                    | Low                        | Low                    | Low                                    | Low                            | Low                     | Low                 | Low        |
| Khattri USA 2017 <sup>17</sup>                    | Low                        | Low                    | Low                                    | Low                            | Low                     | Low                 | Low        |
| Simpson USA 2016 SOLO1 <sup>18</sup>              | Low                        | Low                    | Low                                    | Low                            | Low                     | Low                 | Low        |
| Simpson USA 2016 SOLO2 <sup>18</sup>              | Low                        | Low                    | Low                                    | Low                            | Low                     | Low                 | Low        |
| Thaci Germany 2015 <sup>19,20</sup>               | Low                        | Low                    | Low                                    | Low                            | Low                     | Low                 | Low        |
| Blauvelt USA 2017 <sup>21</sup>                   | Low                        | Low                    | Low                                    | Low                            | Low                     | Low                 | Low        |
| Goujon France 2018 <sup>22</sup>                  | Low                        | Low                    | High                                   | Low                            | Unclear                 | Low                 | Low        |
| Ruzicka Germany 2017 <sup>23</sup>                | Low                        | Low                    | Low                                    | Low                            | High                    | Low                 | Low        |
| Saeki Japan 2017 <sup>24</sup>                    | Low                        | Low                    | Low                                    | Low                            | Low                     | Low                 | Low        |
| Upadacitinib abstracts 2019 <sup>25,26</sup>      | Unclear                    | Unclear                | Low                                    | Low                            | Low                     | Unclear             | Low        |
| de Bruin-Weller Netherlands 2018 <sup>27</sup>    | Low                        | Low                    | Low                                    | Low                            | Low                     | Low                 | Low        |
| Guttman-Yassky USA 2018 Fezakinumab <sup>28</sup> | Unclear                    | Unclear                | Low                                    | Low                            | Low                     | Low                 | Low        |
| Guttman-Yassky USA 2018 Baricitinib <sup>29</sup> | Low                        | Low                    | Low                                    | Low                            | Low                     | Low                 | Low        |
| Simpson USA 2018 Lebrikizumab <sup>30</sup>       | Low                        | Unclear                | Low                                    | Low                            | Low                     | Low                 | Low        |

| Reference                                       | Random sequence generation | Allocation concealment | Blinding of participants and personnel | Blinding of outcome assessment | Incomplete outcome data | Selective reporting | Other bias |
|-------------------------------------------------|----------------------------|------------------------|----------------------------------------|--------------------------------|-------------------------|---------------------|------------|
| Wollenberg USA 2018 <sup>31</sup>               | Low                        | Low                    | Low                                    | Low                            | Low                     | Low                 | Low        |
| Blauvelt USA 2018 <sup>32</sup>                 | Low                        | Low                    | Low                                    | Low                            | Unclear                 | Low                 | Low        |
| Guttman-Yassky USA 2019 Dupilumab <sup>33</sup> | Low                        | Low                    | Low                                    | Low                            | Unclear                 | Low                 | Low        |
| Guttman-Yassky USA 2019 GBR 830 <sup>34</sup>   | Low                        | Low                    | Low                                    | Low                            | Low                     | High                | Low        |
| Simpson USA 2018 Apremilast <sup>35</sup>       | Low                        | Low                    | Low                                    | Low                            | Low                     | Unclear             | Low        |
| Simpson USA 2019 Tezepelumab <sup>36</sup>      | Low                        | Low                    | Low                                    | Low                            | High                    | Low                 | Low        |
| Werfel Germany 2018 <sup>37</sup>               | Low                        | Low                    | Low                                    | Low                            | High                    | Low                 | Low        |
| NCT01785602; Fevipiprant (QAW039) <sup>38</sup> | Unclear                    | Unclear                | Low                                    | Low                            | Unclear                 | Low                 | Low        |
| Gooderham Canada 2019 <sup>39,40</sup>          | Low                        | Low                    | Low                                    | Low                            | High                    | Unclear             | Low        |
| Paller USA 2019 Dupilumab <sup>41,42</sup>      | Unclear                    | Unclear                | Low                                    | Low                            | Low                     | Low                 | Low        |
| Silverberg USA 2019 Dupilumab <sup>43,44</sup>  | Low                        | Low                    | Low                                    | Low                            | Unclear                 | Low                 | Low        |

Reasons for risk of bias assessment can be found at [eczematherapies.com/research](http://eczematherapies.com/research).

**eFigure 1.** Network Plot of Arms Included in the Network Meta-analysis of Change in POEM Score up to 16 Weeks of Treatment – Main Analysis

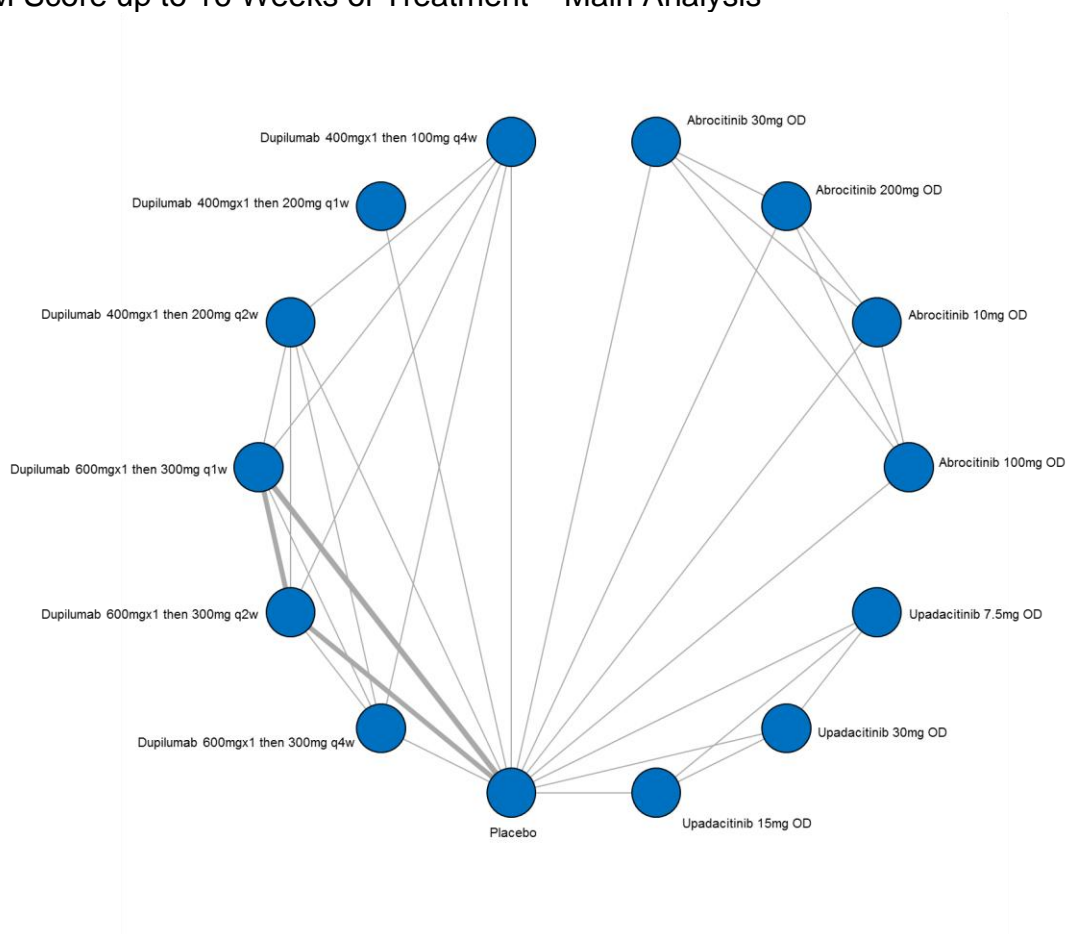

**eFigure 2.** Network Plot of Arms Included in the Network Meta-analysis of Change in DLQI Score up to 16 Weeks of Treatment – Main Analysis

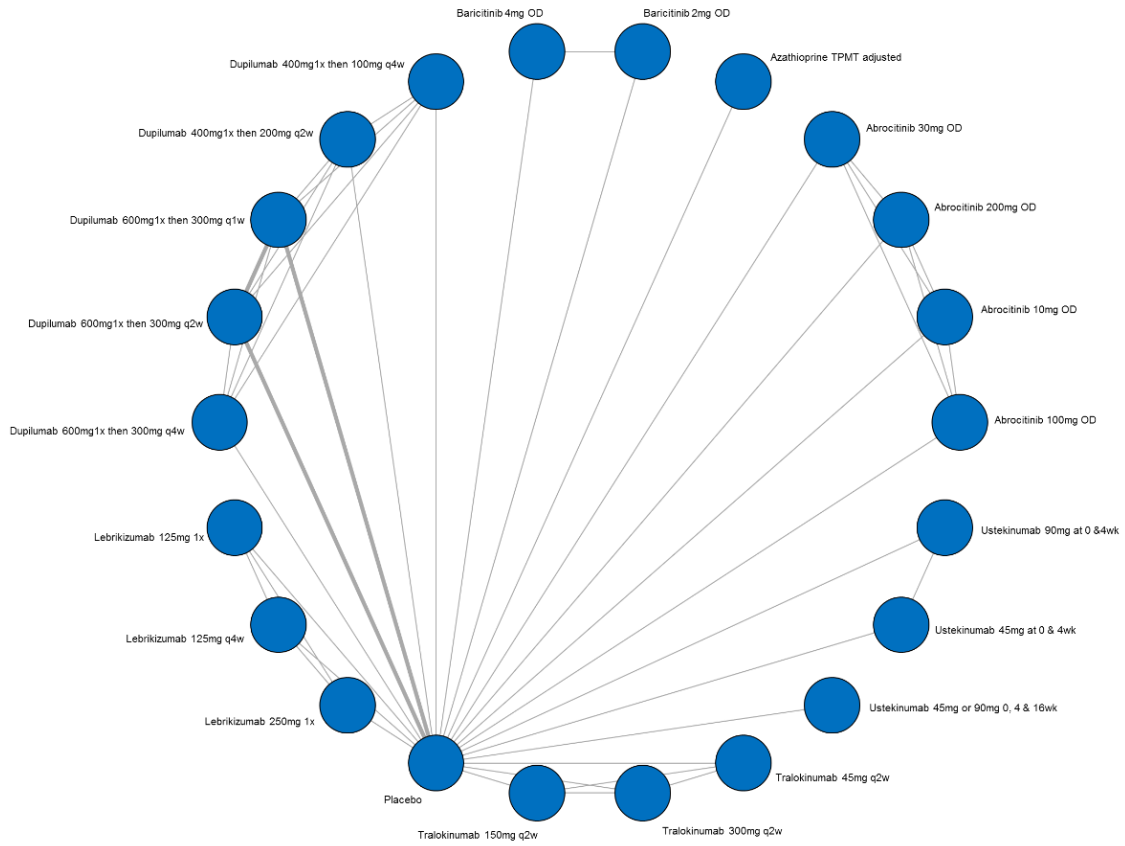

**eFigure 3.** Network Plot of Arms Included in the Network Meta-analysis of Change in QoL on the Standardized Mean Difference Scale up to 16 Weeks of Treatment – Among Medications Currently in Use

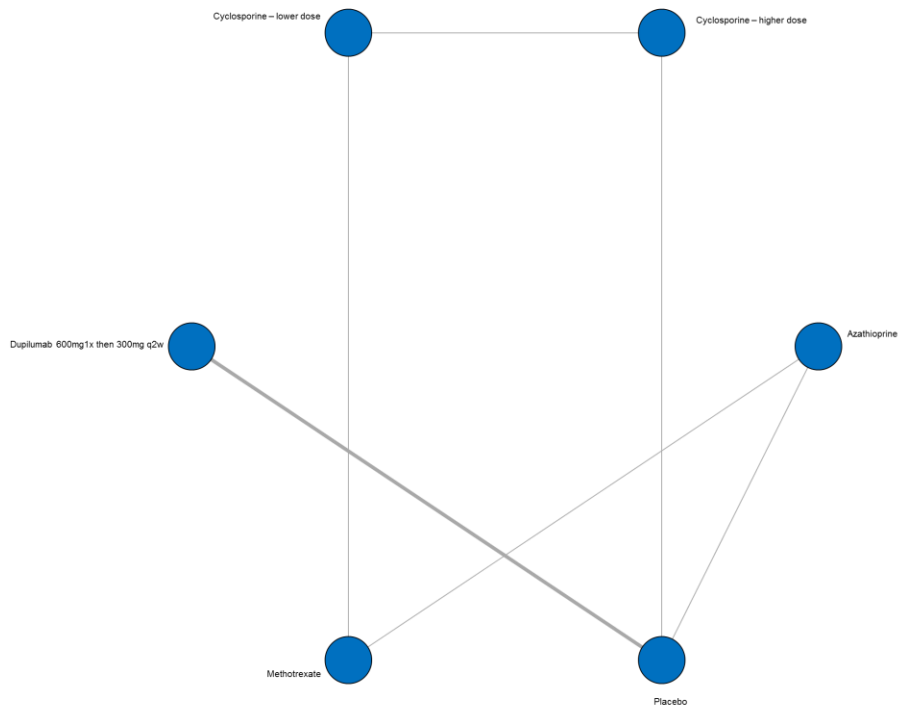

**eTable 2.** League Table of Arms Included in the Network Meta-analysis of Change in QoL on the Standardized Mean Difference Scale up to 16 Weeks of Treatment Among Medications Currently in Use

|                     |                                 |                                |                                          |                     |                 |
|---------------------|---------------------------------|--------------------------------|------------------------------------------|---------------------|-----------------|
| <b>Azathioprine</b> | -0.5 (-1.3, 0.3)                | -0.2 (-1, 0.5)                 | -0.7 (-1.3, 0)                           | -0.1 (-0.7, 0.6)    | 0.1 (-0.5, 0.8) |
| 0.5 (-0.3, 1.3)     | <b>Cyclosporine higher dose</b> | 0.3 (-0.3, 0.8)                | -0.1 (-0.9, 0.6)                         | 0.5 (-0.3, 1.2)     | 0.7 (0, 1.4)    |
| 0.2 (-0.5, 1)       | -0.3 (-0.8, 0.3)                | <b>Cyclosporine lower dose</b> | -0.4 (-1.2, 0.4)                         | 0.2 (-0.4, 0.7)     | 0.4 (-0.4, 1.1) |
| 0.7 (0, 1.3)        | 0.1 (-0.6, 0.9)                 | 0.4 (-0.4, 1.2)                | <b>Dupilumab 600mg 1x then 300mg q2w</b> | 0.6 (-0.2, 1.4)     | 0.8 (0.6, 1)    |
| 0.1 (-0.6, 0.7)     | -0.5 (-1.2, 0.3)                | -0.2 (-0.7, 0.4)               | -0.6 (-1.4, 0.2)                         | <b>Methotrexate</b> | 0.2 (-0.5, 1)   |
| -0.1 (-0.8, 0.5)    | -0.7 (-1.4, 0)                  | -0.4 (-1.1, 0.4)               | -0.8 (-1, -0.6)                          | -0.2 (-1, 0.5)      | <b>Placebo</b>  |



**eFigure 4.** Network Plot of Arms Included in the Network Meta-analysis of Change in Itch on the Standardized Mean Difference Scale up to 16 Weeks of Treatment – Among Medications Currently in Use

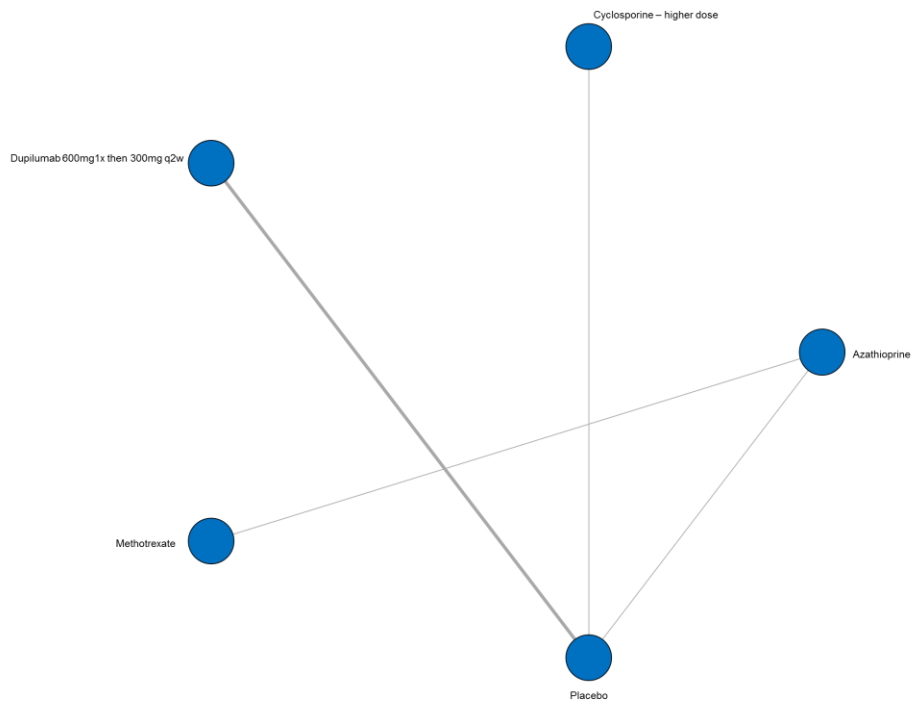

**eTable 3.** League Table of Arms Included in the Network Meta-analysis of Change in Itch on the Standardized Mean Difference Scale up to 16 Weeks of Treatment Among Medications Currently in Use

Results are presented as the mean difference (95% CrI) in itch between the two arms on the standardized mean difference. A positive effect estimate in a given cell favors the row-defining treatment. A negative effect estimate in a given cell favors the column-defining treatment.

|                     |                                   |                                          |                     |                 |
|---------------------|-----------------------------------|------------------------------------------|---------------------|-----------------|
| <b>Azathioprine</b> | -0.5 (-1.9, 0.8)                  | -0.6 (-1.5, 0.3)                         | 0 (-0.8, 0.9)       | 0.3 (-0.6, 1.1) |
| 0.5 (-0.8, 1.9)     | <b>Cyclosporine - higher dose</b> | 0 (-1.2, 1)                              | 0.6 (-1.1, 2.2)     | 0.8 (-0.3, 1.8) |
| 0.6 (-0.3, 1.5)     | 0 (-1, 1.2)                       | <b>Dupilumab 600mg 1x then 300mg q2w</b> | 0.6 (-0.6, 1.9)     | 0.8 (0.5, 1.2)  |
| 0 (-0.9, 0.8)       | -0.6 (-2.2, 1.1)                  | -0.6 (-1.9, 0.6)                         | <b>Methotrexate</b> | 0.2 (-1, 1.4)   |
| -0.3 (-1.1, 0.6)    | -0.8 (-1.8, 0.3)                  | -0.8 (-1.2, -0.5)                        | -0.2 (-1.4, 1)      | <b>Placebo</b>  |

## eReferences

1. Sowden JM, Berth-Jones J, Ross JS, et al. Double-blind, controlled, crossover study of cyclosporine in adults with severe refractory atopic dermatitis. *Lancet* 1991; 338(8760): 137-40.
2. Hanifin JM, Schneider LC, Leung DY, et al. Recombinant interferon gamma therapy for atopic dermatitis. *Journal of the American Academy of Dermatology* 1993; 28(2 Pt 1): 189-97.
3. Munro CS, Levell NJ, Shuster S, Friedmann PS. Maintenance treatment with cyclosporine in atopic eczema. *The British journal of dermatology* 1994; 130(3): 376-80.
4. Czech W, Brautigam M, Weidinger G, Schopf E. A body-weight-independent dosing regimen of cyclosporine microemulsion is effective in severe atopic dermatitis and improves the quality of life. *Journal of the American Academy of Dermatology* 2000; 42(4): 653-9.
5. Jang IG, Yang JK, Lee HJ, et al. Clinical improvement and immunohistochemical findings in severe atopic dermatitis treated with interferon gamma. *Journal of the American Academy of Dermatology* 2000; 42(6): 1033-40.
6. Granlund H, Erkkö P, Remitz A, et al. Comparison of cyclosporine and UVAB phototherapy for intermittent one-year treatment of atopic dermatitis. *Acta Derm Venereol* 2001; 81(1): 22-7.
7. Berth-Jones J, Takwale A, Tan E, et al. Azathioprine in severe adult atopic dermatitis: a double-blind, placebo-controlled, crossover trial. *The British journal of dermatology* 2002; 147(2): 324-30.
8. Pacor ML, Di Lorenzo G, Martinelli N, Mansueto P, Rini GB, Corrocher R. Comparing tacrolimus ointment and oral cyclosporine in adult patients affected by atopic dermatitis: a randomized study. *Clin Exp Allergy* 2004; 34(4): 639-45.
9. Bemanian MH, Movahedi M, Farhodi A, et al. High doses intravenous immunoglobulin versus oral cyclosporine in the treatment of severe atopic dermatitis. *Iranian journal of allergy, asthma, and immunology* 2005; 4(3): 139-43.
10. Meggitt SJ, Gray JC, Reynolds NJ. Azathioprine dosed by thiopurine methyltransferase activity for moderate-to-severe atopic eczema: a double-blind, randomised controlled trial. *Lancet* 2006; 367(9513): 839-46.
11. Jee SJ, Kim JH, Baek HS, Lee HB, Oh JW. Long-term Efficacy of Intravenous Immunoglobulin Therapy for Moderate to Severe Childhood Atopic Dermatitis. *Allergy Asthma Immunol Res* 2011; 3(2): 89-95.
12. Schram ME, Roekevisch E, Leeftang MM, Bos JD, Schmitt J, Spuls PI. A randomized trial of methotrexate versus azathioprine for severe atopic eczema. *The Journal of allergy and clinical immunology* 2011; 128(2): 353-9.
13. El-Khalawany MA, Hassan H, Shaaban D, Ghonaim N, Eassa B. Methotrexate versus cyclosporine in the treatment of severe atopic dermatitis in children: a multicenter experience from Egypt. *Eur J Pediatr* 2013; 172(3): 351-6.
14. Iyengar SR, Hoyte EG, Loza A, et al. Immunologic effects of omalizumab in children with severe refractory atopic dermatitis: a randomized, placebo-controlled clinical trial. *International archives of allergy and immunology* 2013; 162(1): 89-93.
15. Beck LA, Thaci D, Hamilton JD, et al. Dupilumab treatment in adults with moderate-to-severe atopic dermatitis. *The New England journal of medicine* 2014; 371(2): 130-9.
16. Tsianakas A, Luger TA, Radin A. Dupilumab treatment improves quality of life in adult patients with moderate-to-severe atopic dermatitis: results from a randomized, placebo-controlled clinical trial. *The British journal of dermatology* 2018; 178(2): 406-14.
17. Khattri S, Brunner PM, Garcet S, et al. Efficacy and safety of ustekinumab treatment in adults with moderate-to-severe atopic dermatitis. *Exp Dermatol* 2016.
18. Simpson EL, Bieber T, Guttman-Yassky E, et al. Two Phase 3 Trials of Dupilumab versus Placebo in Atopic Dermatitis. *The New England journal of medicine* 2016; 375(24): 2335-48.
19. Thaci D, Simpson EL, Beck LA, et al. Efficacy and safety of dupilumab in adults with moderate-to-severe atopic dermatitis inadequately controlled by topical treatments: a randomised, placebo-controlled, dose-ranging phase 2b trial. *Lancet* 2016; 387(10013): 40-52.
20. Simpson EL, Gadkari A, Worm M, et al. Dupilumab therapy provides clinically meaningful improvement in patient-reported outcomes (PROs): A phase IIb, randomized, placebo-controlled, clinical trial in adult patients with moderate to severe atopic dermatitis (AD). *Journal of the American Academy of Dermatology* 2016; 75(3): 506-15.

21. Blauvelt A, de Bruin-Weller M, Gooderham M, et al. Long-term management of moderate-to-severe atopic dermatitis with dupilumab and concomitant topical corticosteroids (LIBERTY AD CHRONOS): a 1-year, randomised, double-blinded, placebo-controlled, phase 3 trial. *Lancet* 2017; 389(10086): 2287-303.
22. Goujon C, Viguier M, Staumont-Salle D, et al. Methotrexate Versus Cyclosporine in Adults with Moderate-to-Severe Atopic Dermatitis: A Phase III Randomized Noninferiority Trial. *J Allergy Clin Immunol Pract* 2017.
23. Ruzicka T, Hanifin JM, Furue M, et al. Anti-Interleukin-31 Receptor A Antibody for Atopic Dermatitis. *The New England journal of medicine* 2017; 376(9): 826-35.
24. Saeki H, Kabashima K, Tokura Y, et al. Efficacy and safety of ustekinumab in Japanese patients with severe atopic dermatitis: a randomized, double-blind, placebo-controlled, phase II study. *The British journal of dermatology* 2017; 177(2): 419-27.
25. De Bruin-Weller M, Guttman-Yassky E, Forman S, et al. Effects of upadacitinib on atopic dermatitis signs, symptoms and patient-reported outcomes from a phase IIb randomized, placebo-controlled trial. *BRITISH JOURNAL OF DERMATOLOGY*; 2018: WILEY 111 RIVER ST, HOBOKEN 07030-5774, NJ USA; 2018. p. E13-E.
26. Reich K, Guttman-Yassky E, Beck L, Hu X, Pangan A, Teixeira H. Early response to upadacitinib in moderate-to-severe atopic dermatitis: Results from a phase 2b randomized, placebo-controlled trial. *Allergy*; 2018: WILEY 111 RIVER ST, HOBOKEN 07030-5774, NJ USA; 2018. p. 76-.
27. de Bruin-Weller M, Thaci D, Smith CH, et al. Dupilumab with concomitant topical corticosteroid treatment in adults with atopic dermatitis with an inadequate response or intolerance to ciclosporin A or when this treatment is medically inadvisable: a placebo-controlled, randomized phase III clinical trial (LIBERTY AD CAFE). *The British journal of dermatology* 2018; 178(5): 1083-101.
28. Guttman-Yassky E, Brunner PM, Neumann AU, et al. Efficacy and safety of fezakinumab (an IL-22 monoclonal antibody) in adults with moderate-to-severe atopic dermatitis inadequately controlled by conventional treatments: A randomized, double-blind, phase 2a trial. *Journal of the American Academy of Dermatology* 2018; 78(5): 872-81 e6.
29. Guttman-Yassky E, Silverberg JI, Nemoto O, et al. Baricitinib in adult patients with moderate-to-severe atopic dermatitis: a phase 2 parallel, double-blinded, randomized placebo-controlled multiple-dose study. *Journal of the American Academy of Dermatology* 2018; 80(4): 913-21.e9.
30. Simpson EL, Flohr C, Eichenfield LF, et al. Efficacy and safety of lebrikizumab (an anti-IL-13 monoclonal antibody) in adults with moderate-to-severe atopic dermatitis inadequately controlled by topical corticosteroids: A randomized, placebo-controlled phase II trial (TREBLE). *Journal of the American Academy of Dermatology* 2018; 78(5): 863-71 e11.
31. Wollenberg A, Howell MD, Guttman-Yassky E, et al. Treatment of atopic dermatitis with tralokinumab, an anti-IL-13 mAb. *The Journal of allergy and clinical immunology* 2019; 143(1): 135-41.
32. Blauvelt A, Simpson EL, Tyring SK, et al. Dupilumab does not affect correlates of vaccine-induced immunity: A randomized, placebo-controlled trial in adults with moderate-to-severe atopic dermatitis. *Journal of the American Academy of Dermatology* 2019; 80(1): 158-67 e1.
33. Guttman-Yassky E, Bissonnette R, Ungar B, et al. Dupilumab progressively improves systemic and cutaneous abnormalities in patients with atopic dermatitis. *Journal of Allergy and Clinical Immunology* 2019; 143(1): 155-72.
34. Guttman-Yassky E, Pavel AB, Zhou L, et al. GBR 830, an anti-OX40, improves skin gene signatures and clinical scores in patients with atopic dermatitis. *The Journal of allergy and clinical immunology* 2019; 144(2): 482-93.e7.
35. Simpson EL, Imafuku S, Poulin Y, et al. A Phase 2 Randomized Trial of Apremilast in Patients with Atopic Dermatitis. *The Journal of investigative dermatology* 2019; 139(5): 1063-72.
36. Simpson EL, Parnes JR, She D, et al. Tezepelumab, an anti-thymic stromal lymphopoietin monoclonal antibody, in the treatment of moderate to severe atopic dermatitis: A randomized phase 2a clinical trial. *Journal of the American Academy of Dermatology* 2019; 80(4): 1013-21.
37. Werfel T, Layton G, Yeadon M, et al. Efficacy and safety of the histamine H4 receptor antagonist ZPL-3893787 in patients with atopic dermatitis. *The Journal of allergy and clinical immunology* 2019; 143(5): 1830-7 e4.
38. Efficacy and Safety Study of QAW039 in the Treatment of Patients With Moderate to Severe Atopic Dermatitis. <https://ClinicalTrials.gov/show/NCT01785602>.
39. Study To Evaluate PF-04965842 In Subjects With Moderate To Severe Atopic Dermatitis. <https://ClinicalTrials.gov/show/NCT02780167>.

40. Gooderham MJ, Forman SB, Bissonnette R, et al. Efficacy and Safety of Oral Janus Kinase 1 Inhibitor Abrocitinib for Patients With Atopic Dermatitis: A Phase 2 Randomized Clinical Trial. *JAMA dermatology* 2019; [Epub ahead of print].
41. Efficacy and Safety of Dupilumab in Participants  $\geq 12$  to  $< 18$  Years of Age, With Moderate-to-severe Atopic Dermatitis. <https://ClinicalTrials.gov/show/NCT03054428>.
42. Paller A, Blauvelt A, Pariser D, et al. Dupilumab for adolescents with moderate-to-severe atopic dermatitis: Results from a phase 3, randomized, double-blinded trial: 10051. *Journal of the American Academy of Dermatology* 2019; 81(4).
43. Dose-ranging Study of Nemolizumab in Atopic Dermatitis. <https://ClinicalTrials.gov/show/NCT03100344>.
44. Silverberg JI, Pinter A, Pulka G, et al. Phase 2B randomized study of nemolizumab in adults with moderate-to-severe atopic dermatitis and severe pruritus. *The Journal of allergy and clinical immunology* 2019; [Epub ahead of print].
